22 Kyorin University School of Medicine

23 6-20-2, Shinkawa, Mitaka, Tokyo, 181-8611, Japan

24 E-mail: [kouki7@ks.kyorin-u.ac.jp](mailto:kouki7@ks.kyorin-u.ac.jp)

## 25 **Abstract:**

### 26 **Objective**

27 In Japan, healthcare workers (HCWs) are vaccinated against contagious viruses  
28 (measles, rubella, chickenpox, mumps, and hepatitis B) to prevent nosocomial infection;  
29 however, some do not produce sufficient antibodies (suboptimal responders). Whether  
30 suboptimal responders to live attenuated viruses or inactivated viruses vaccines can  
31 produce adequate antibodies to severe acute respiratory syndrome coronavirus 2  
32 (SARS-CoV-2) mRNA vaccines remains to be elucidated.

### 33 **Methods**

34 In this prospective cohort study, SARS-CoV-2 anti-spike antibodies were  
35 measured 11 times, from before the first BNT162b2 vaccination to 5 months after the  
36 second vaccination. Antibody titers of suboptimal and normal responders were  
37 compared. SARS-CoV-2 neutralizing antibody activity was measured twice in  
38 suboptimal responders, 1 week to 1 month, and 5 months after the second vaccination.

### 39 **Patients**

40 This study included 50 HCWs who received two doses of mRNA BNT162b2  
41 vaccine 3 weeks apart.

### 42 **Results**

43 After vaccination, the SARS-CoV-2 anti-spike antibody was detectable in the  
44 samples from suboptimal and normal responders at each timepoint. The median SARS-  
45 CoV-2 anti-spike antibody titer was higher in suboptimal responders than in normal  
46 responders 1 week after receiving the second dose of BNT162b2 vaccine (3721.0 vs.  
47 2251.5,  $P=0.029$ ). Suboptimal responders had SARS-CoV-2 neutralizing antibody

48 activity 1 week to 1 month, and 5 months after the second vaccination, which exceeded  
49 the positive threshold 5 months after the second vaccination.

## 50 **Conclusion**

51 After BNT162b2 vaccination, suboptimal responders acquired adequate SARS-  
52 CoV-2 anti-spike and SARS-CoV-2 neutralizing antibodies to prevent SARS-CoV-2.  
53 These results suggest that vaccination with mRNA vaccine against SARS-CoV-2 should  
54 also be recommended for suboptimal responders to conventional vaccines.

55

56 **Keywords:**

57 coronavirus disease 2019 (COVID-19), severe acute respiratory syndrome coronavirus 2  
58 (SARS-CoV-2), mRNA vaccine, anti-spike antibody, neutralizing antibody

59

## 60 **Introduction**

61           Coronavirus disease (COVID-19), which is caused by severe acute respiratory  
62   syndrome coronavirus 2 (SARS-CoV-2), has been declared a pandemic (1-4). In view of  
63   the high number of cases of severe illness and death due to COVID-19, vaccination  
64   against SARS-CoV-2 infection is crucial.

65           SARS-CoV-2 has an enveloped, single, positive-stranded RNA genome that  
66   encodes four major viral structural proteins, namely, the nucleocapsid, spike, envelope,  
67   and membrane proteins; the latter three proteins are found in its membrane. The spike  
68   protein guides viral entry into host cells by binding to angiotensin-converting enzyme 2  
69   (ACE2) receptors, which are widely expressed on epithelial cells and macrophages (5-7)  
70   and is thus an ideal target for messenger RNA (mRNA) vaccine development.

71           The BNT162b2 mRNA vaccine (Pfizer–BioNTech) is highly effective at  
72   preventing clinically significant COVID-19 (8-10), reducing the incidence of  
73   asymptomatic infection and associated infectivity (11,12), and preventing the spread of  
74   COVID-19 (9). The BNT162b2 vaccine was the first SARS-CoV-2 vaccine to be  
75   approved in Japan, and priority vaccination of healthcare workers (HCWs) began in  
76   February 2021 in order to safeguard the medical delivery system (13).

77           HCWs also have a high risk of infection with other contagious viruses such as  
78   measles, rubella, chickenpox, mumps, and hepatitis B. Therefore, in Japan, HCWs are  
79   vaccinated against these viruses to prevent nosocomial infections and viral antibody  
80   titers are measured to ensure the presence of protective antibody levels (14). However,  
81   some individuals do not develop adequate antibody titers against contagious viruses  
82   even after vaccination. Such individuals are called suboptimal responders. It is unclear

83 whether suboptimal responders to conventional vaccines can produce adequate SARS-  
84 CoV-2 antibodies, including neutralizing antibodies, after vaccination with the  
85 BNT162b2 vaccine to protect them against SARS-CoV-2 infection. Therefore, in this  
86 study, we investigated whether suboptimal responders acquired SARS-CoV-2 anti-spike  
87 and SARS-CoV-2 neutralizing antibodies after vaccination with the BNT162b2 vaccine.

88

## 89 **Materials and methods**

90

### 91 ***Participants***

92 The study was conducted at Kyorin University Hospital in Tokyo, Japan.  
93 HCWs at the hospital received two doses of the BNT162b2 vaccine 3 weeks apart. The  
94 participants were HCWs at the hospital who agreed to participate in the study and to  
95 periodically donate blood samples before and after vaccination. Those whose antibody  
96 levels were below the standard values for preventing infection after receiving two or  
97 more doses of vaccine against measles, rubella, chickenpox, mumps, or hepatitis B  
98 viruses were classified as suboptimal responders.

99

### 100 ***SARS-CoV-2 anti-spike antibody assay***

101 SARS-CoV-2 anti-spike antibody measurements were performed on serum  
102 obtained from centrifuged peripheral blood using the Elecsys Anti-SARS-CoV-2 S RUO  
103 (Roche Diagnostics International Ltd, Rotkreuz, Switzerland) on a Cobas 6000 (Roche  
104 Diagnostics) analyzer via the double-antigen sandwich enzyme-linked immunoassay  
105 method (15). Samples were collected before the first dose of BNT162b2 vaccine was

106 administered; 3 days after the first vaccination; 1, 2, and 3 weeks after the first  
107 vaccination; 1 week after the second vaccination; and 1, 2, 3, 4, and 5 months after the  
108 second vaccination. The measurement range of the antibody assay was 0.4–250, and  
109 samples with an antibody titer of  $\geq 250$  U/mL were assayed again after dilution.

110

### 111 ***SARS-CoV-2 neutralizing antibody assay***

112 Using serum obtained from the peripheral blood of suboptimal responders after  
113 vaccination, SARS-CoV-2 neutralizing antibody activity was measured at Osaka  
114 University Microbial Disease Research Association Laboratory. A 50% inhibitory  
115 dilution factor (ID<sub>50</sub>) using pseudovirus (16) was measured, and ID<sub>50</sub> values of  $\geq 50$  was  
116 considered positive (17). For the neutralization assay, 60  $\mu$ L of pseudovirus, which is  
117 equivalent to  $2.5 \times 10^6$  relative light units (RLU)/mL, was incubated with 60  $\mu$ L of serial  
118 dilutions of serum samples for 1 h at 37°C. After incubation, 100  $\mu$ L of the mixture was  
119 added to the Vero cells in a 96-well plate. The cells were lysed 24 h post-infection,  
120 luciferase was activated using the Luciferase Assay System (E1501, Promega,  
121 Wisconsin, USA), and RLU were measured using a Synergy LX analyzer (BioTek,  
122 USA). Percent neutralization was calculated using GraphPad Prism 8.0.2 (GraphPad  
123 Software, San Diego, California, USA). Percentages of RLU reduction (inhibition rate)  
124 were calculated as follows:  $1 - (\text{RLU of sample sera} - \text{pseudovirus only wells}) / (\text{RLU}$   
125  $\text{from medium only wells} - \text{pseudovirus only wells}) \times 100\%$ . The titers of neutralizing  
126 sera were calculated as ID<sub>50</sub>. The transition of neutralizing antibody activity values after  
127 vaccination in suboptimal responders was examined 1 week to 1 month and 5 months  
128 after receiving the second dose of the BNT162b2 vaccine.

129

## 130 *Statistical analysis*

131 Nonparametric continuous data are reported as median and interquartile range  
132 (IQR). The Mann–Whitney U test was performed to assess whether differences between  
133 cohorts were statistically significant. Two-sided *P*-values of <0.05 were considered  
134 statistically significant. The Wilcoxon matched-pairs signed rank test was performed to  
135 assess whether differences in antibody levels within an individual at different time  
136 points were statistically significant. To compare the age (ratio of the number of  
137 individuals aged 20–40 years and those aged 50–60 years) and sex compositions of the  
138 suboptimal responders and normal responders, Fisher’s exact test was performed to test  
139 the statistical significance. The Mann–Whitney U test was performed to test for  
140 statistically significant differences in antibody levels between suboptimal responders  
141 and normal responders 1 week after the second vaccination. All statistical analyses were  
142 performed with EZR (Saitama Medical Center, Jichi Medical University, Saitama,  
143 Japan), which is a graphical user interface for R (The R Foundation for Statistical  
144 Computing, Vienna, Austria) (18). Specifically, EZR is a modified version of R  
145 commander (version 1.54) that has been designed to add statistical functions frequently  
146 used in biostatistics.

147

## 148 **Results**

149 The suboptimal responders comprised three men (L1, L2, L4) with negative  
150 (titer <16.0) anti-measles immunoglobulin G (IgG) antibody titer after measles virus  
151 vaccination and one woman (L3) with a negative (titer <4.0) anti-mumps IgG antibody



152 titer after mumps virus vaccination. Forty-six participants, comprising 12 men and 34  
153 women, had antiviral antibody titers after vaccination against other viruses above the  
154 standard value (normal responders). The four suboptimal responders were aged 20–40  
155 years. Normal responders were older than suboptimal responders (the ratios of the  
156 number of those aged 50–60 years were 57% vs. 0%, respectively), but no significant  
157 difference was observed ( $P > 0.99$ ). In addition, the male/female ratio was higher in  
158 suboptimal responders than in normal responders (74% vs. 15%), but no significant  
159 difference was observed ( $P > 0.99$ ). All suboptimal responders were non-smokers and  
160 non-obese, and none of them had a history of immunosuppressive drug use or having a  
161 medical condition associated with immunodeficiency.

162

### 163 ***SARS-CoV-2 anti-spike antibody levels***

164 The median (IQR) SARS-CoV-2 anti-spike antibody titer was 2251.5 (1639.0–  
165 3276.3) in the normal responders and 3721.0 (3255.0–4983.3) in the suboptimal  
166 responders 1 week after receiving the second dose of BNT162b2 vaccine. This  
167 difference was statistically significant ( $P=0.029$ ) (Fig. 1A). For the total antibody level  
168 1 week after the second vaccination, there was no significant difference in the median  
169 antibody levels between those aged 50–60 years and those aged 20–40 years ( $P=0.66$ ).

170 The median (IQR) SARS-CoV-2 anti-spike antibody in normal responders was  
171 2251.5 (1639.0–3276.3) and 779.3 (534.6–1024.3) measured 1 week and 5 months,  
172 respectively, after receiving the second dose of BNT162b2 vaccine (Fig. 1B). In  
173 suboptimal responders, the median (IQR) SARS-CoV-2 anti-spike antibody titers were

174 3721.0 (3255.0–4983.3) and 666.7 (578.9–880.6) measured 1 week and 5 months,  
175 respectively, after receiving the second dose of BNT162b2 vaccine (Fig. 1C).  
176 SARS-CoV-2 anti-spike antibody was produced by both suboptimal and normal  
177 responders, but the level was lower at 5 months than at 1 week after the second dose of  
178 vaccine (Fig. 1).  
179

180 (A) SARS-CoV-2 anti-spike antibody responses over the whole study period from  
181 before the first dose to 5 months after the second dose of vaccine.

182 (B) SARS-CoV-2 anti-spike antibody titers in normal responders 1 week and 5 months  
183 after receiving the second dose of the BNT162b2 vaccine. The antibody titers were  
184 significantly lower at 5 months than at 1 week after the second dose ( $P<0.001$ ).

185 (C) SARS-CoV-2 anti-spike antibody titers in suboptimal responders 1 week and 5  
186 months after receiving the second dose of the BNT162b2 vaccine. The antibody titers  
187 decreased, but the decrease was not statistically significant ( $P=0.068$ ).

188 The box plot comparisons were performed using the Mann–Whitney U test.  $P$ -values  
189  $<0.05$  were considered statistically significant. Suboptimal responders had low-level  
190 antibody responses to previous measles or mumps vaccines, and normal responders had  
191 normal antibody responses to previous antiviral vaccines.

192 NaN; not a number

193

194 ***SARS-CoV-2 neutralizing antibody activity in participants with***  
195 ***suboptimal antibody responses to previous antiviral vaccines***

196 SARS-CoV-2 neutralizing antibody titers were 1154.0 in L1 at 1 week after  
197 receiving the second dose of BNT162b2 vaccine and 774.2, 638.3, and 654.6 in L2, L3,  
198 and L4, respectively, at 1 month after receiving the second dose of BNT162b2 vaccine  
199 (Fig. 2). In the 5 months after the second vaccination, SARS-CoV-2 neutralizing  
200 antibody titers were 105.5, 147.7, 485.2, and 894.4 in L1, L2, L3, and L4, respectively  
201 (Fig. 2). All four suboptimal responders had a neutralizing antibody activity within the  
202 protective range ( $\geq 50$ ), from the 1 week to 1 month and 5 months after the second

203 vaccination (Fig. 2). The SARS-CoV-2 neutralizing antibody level in suboptimal  
204 responders was lower at 5 months after receiving the second dose of BNT162b2 vaccine  
205 than at 1 week to 1 month after receiving the second dose, but this difference was not  
206 statistically significant ( $P=0.38$ ) (Fig. 2).

207

208 Data are presented as 50% inhibitory dilutions ( $ID_{50}$ ). The dashed line indicates the  
209 cutoff for  $ID_{50}$  (17).

210

## 211 **Discussion**

212 The BNT162b2 vaccine has been highly effective in preventing clinically  
213 significant COVID-19 (8-10). However, limited information is available about the  
214 effectiveness of the BNT162b2 vaccine in suboptimal responders to conventional  
215 vaccines. In this study, suboptimal responders produced adequate SARS-CoV-2 anti-  
216 spike antibodies and neutralizing antibodies.

217 Muik et al. (19) measured the neutralization efficacy of sera from 40 healthy  
218 German individuals immunized with the BNT162b2 vaccine and a 50% inhibitory  
219 dilution factor using pseudovirus according to the same method as was used in this  
220 study. The SARS-CoV-2 neutralizing activity of the suboptimal responders in this study  
221 1 week to 1 month after receiving the second dose of BNT162b2 vaccine was  
222 comparable to that of the participants in the German study. All four suboptimal  
223 responders developed protective levels of neutralizing antibodies. The SARS-CoV-2  
224 neutralizing antibody activity value in the fifth month after the second dose of  
225 BNT162b2 vaccine did not show a significant decrease in activity compared with that 1  
226 week to 1 month after receiving the second dose of BNT162b2 vaccine. The SARS-

227 CoV-2 anti-spike antibody titer was lower at 5 months after the second dose of  
228 BNT162b2 vaccine than at 1 week after the second dose, but the decrease was not  
229 statistically significant in suboptimal responders. These results suggest that mRNA  
230 vaccines can invoke a protective immune response even in suboptimal responders who  
231 do not develop adequate antibody titers against viruses in response to conventional  
232 vaccines against viral diseases such as mumps and measles.

233         Measles, rubella, chickenpox, and mumps vaccines are live attenuated vaccines  
234 that weaken the toxicity of pathogenic microorganisms, and hepatitis B vaccines are  
235 inactivated vaccines that cause pathogenic microorganisms to lose their ability to infect  
236 (20). In previous studies, approximately 2–10% of healthy individuals do not produce  
237 protective antibody levels in response to viral vaccines (21). The risk factors for low  
238 response to these conventional viral vaccines include male sex, age of >40 years,  
239 smoking habit, obesity, chronic diseases, and genetic factors. However, the factors  
240 associated with a low antibody response to SARS-CoV-2 mRNA vaccines are not well  
241 understood. Smokers, patients with cancer and hematological malignancies, and organ  
242 transplant recipients have been reported to have a lower SARS-CoV-2 anti-spike  
243 antibody response than individuals without these characteristics after receiving SARS-  
244 CoV-2 vaccines (22-26). It is intriguing that the suboptimal responders in this study who  
245 did not produce adequate antibodies against measles or mumps produced adequate  
246 SARS-CoV-2 anti-spike antibodies after receiving the BNT162b2 vaccine. They were  
247 healthy and did not have risk factors such as an organ transplant and  
248 immunosuppression. One possible reason for this discrepancy is the different

249 mechanism of antibody production between conventional vaccines and SARS-CoV-2  
250 mRNA vaccines.

251           The BNT162b2 vaccine is an mRNA vaccine that incorporates mRNA  
252 encoding spike protein (antigen) on the surface of the SARS-CoV-2 into human cells.  
253 The produced antigen directly functions as a template to induce the acquired immune  
254 system (27). On the other hand, with live attenuated vaccines or inactivated vaccines, it  
255 is necessary for recipients to process the vaccine and recognize it as an antigen. The  
256 difference in the mechanism of action of vaccines could be a factor contributing to the  
257 discrepancy in response to the BNT162b2 vaccine from the response to conventional  
258 live attenuated vaccines among suboptimal responders. Such a hypothesis should be  
259 tested in future studies. It is also unclear why suboptimal responders had higher  
260 antibody titers than normal responders in the first week after the second dose of vaccine.

261           Of note, the SARS-CoV-2 anti-spike antibody level is known to peak and then  
262 decrease within months after the second vaccination, which is a much shorter period  
263 than that of antibodies against live attenuated vaccines (28,29). In order to achieve  
264 adequate COVID-19 disease control, a third dose of SARS-CoV-2 mRNA vaccine is  
265 needed, which is already being administered in many countries. In view of the results of  
266 the present study, a third dose of the BNT162b2 vaccine is recommended for both  
267 suboptimal and normal responders to conventional vaccines. (28)

268           This study has some limitations. The number of participants was limited, and  
269 all participants were HCWs vaccinated at a single hospital. In addition, there were no  
270 suboptimal responders to inactivated vaccines (such as hepatitis B) included in this

271 study. Multicenter studies with a larger sample size are needed to confirm the results of  
272 the present study. In addition, further immunological studies are necessary to clarify the  
273 mechanism by which humoral immunity is acquired after mRNA vaccination in  
274 suboptimal responders to conventional vaccines.

275 In conclusion, after two doses of the BNT162b2 vaccine, suboptimal  
276 responders to conventional antiviral vaccines developed protective levels of SARS-  
277 CoV-2 anti-spike and SARS-CoV-2 neutralizing antibodies. These results suggest that  
278 vaccination with mRNA vaccine against SARS-CoV-2 should also be recommended to  
279 suboptimal responders against conventional vaccines.

280

## 281 **Ethics consideration**

282 We carried out a prospective cohort study of 50 HCWs. This study was  
283 conducted with the approval of the Ethics Committee of Kyorin University School of  
284 Medicine (Number R02-041), and was in accordance with the Declaration of Helsinki.  
285 Informed consent was obtained from all study participants.

286

## 287 **Acknowledgments**

288 We thank the HCWs of the Department of Clinical Laboratory, Kyorin  
289 University Hospital involved in the SARS-CoV-2 antibody monitoring for their valuable  
290 contribution.

291

## 292 **References**



- 293 1. Coronaviridae Study Group of the International Committee on Taxonomy of  
294 Viruses, Baker SC, Baric RS, et al. The species severe acute respiratory  
295 syndrome-related coronavirus: classifying 2019-nCoV and naming it SARS-CoV-  
296 2. *Nat Microbiol* 5:536-544, 2020.
- 297 2. Wu F, Zhao S, Yu B, et al. A new coronavirus associated with human respiratory  
298 disease in China. *Nature* 579:265-269, 2020.
- 299 3. Zhou P, Yang XL, Wang XG, et al. A pneumonia outbreak associated with a new  
300 coronavirus of probable bat origin. *Nature* 579:270-273, 2020.
- 301 4. Zhu N, Zhang D, Wang W, et al. A novel coronavirus from patients with  
302 pneumonia in China, 2019. *N Engl J Med* 382:727-733, 2020.
- 303 5. Song Z, Xu Y, Bao L, et al. From SARS to MERS, Thrusting coronaviruses into  
304 the spotlight. *Viruses* 11:59, 2019.
- 305 6. Hoffmann M, Kleine-Weber H, Schroeder S, et al. SARS-CoV-2 cell entry  
306 depends on ACE2 and TMPRSS2 and is blocked by a clinically proven protease  
307 inhibitor. *Cell* 181:271-280.e8, 2020.
- 308 7. Jiang S, Lu L, Liu Q, Xu W, Du L. Receptor-binding domains of spike proteins of  
309 emerging or re-emerging viruses as targets for development of antiviral vaccines.  
310 *Emerg Microbes Infect* 1:e13, 2012.
- 311 8. Haas EJ, Angulo FJ, McLaughlin JM, et al. Impact and effectiveness of mRNA  
312 BNT162b2 vaccine against SARS-CoV-2 infections and COVID-19 cases,  
313 hospitalisations, and deaths following a nationwide vaccination campaign in  
314 Israel: an observational study using national surveillance data. *Lancet* 397:1819-  
315 1829, 2021.

- 316 9. Polack FP, Thomas SJ, Kitchin N, et al. Safety and efficacy of the BNT162b2  
317 mRNA Covid-19 vaccine. *N Engl J Med* 383:2603-2615, 2020.
- 318 10. Dagan N, Barda N, Kepten E, et al. BNT162b2 mRNA Covid-19 vaccine in a  
319 nationwide mass vaccination setting. *N Engl J Med* 384:1412-1423, 2021.
- 320 11. Regev-Yochay G, Amit S, Bergwerk M, et al. Decreased infectivity following  
321 BNT162b2 vaccination: a prospective cohort study in Israel. *Lancet Reg Health*  
322 *Eur* 7:100150, 2021.
- 323 12. Petter E, Mor O, Zuckerman N, et al. Initial real world evidence for lower viral  
324 load of individuals who have been vaccinated by BNT162b2. Preprint; 2021.
- 325 13. Pharmaceuticals and Medical Devices Agency. Special Approval for Emergency  
326 on first COVID-19 vaccine in Japan [media release]. 2021. Available from:  
327 [pmda.go.jp](https://www.pmda.go.jp/english/about-pmda/0003.pdf). [Cited 2022 February 20 ] Available from:  
328 <https://www.pmda.go.jp/english/about-pmda/0003.pdf>
- 329 14. Kumakura S, Shibata H, Onoda K, Nishimura N, Matsuda C, Hirose M.  
330 Seroprevalence survey on measles, mumps, rubella and varicella antibodies in  
331 healthcare workers in Japan: sex, age, occupational-related differences and  
332 vaccine efficacy. *Epidemiol Infect.* Cambridge University Press 142:12-19, 2014.
- 333 15. Riestler E, Findeisen P, Hegel JK, et al. Performance evaluation of the Roche  
334 Elecsys anti-SARS-CoV-2 S immunoassay. *J Virol Methods* 297:114271, 2021.
- 335 16. Nie J, Li Q, Wu J, et al. Quantification of SARS-CoV-2 neutralizing antibody by a  
336 pseudotyped virus-based assay. *Nat Protoc* 15:3699-3715, 2020.
- 337 17. McMahan K, Yu J, Mercado NB, et al. Correlates of protection against SARS-  
338 CoV-2 in rhesus macaques. *Nature* 590:630-634, 2021.

- 339 18. Kanda Y. Investigation of the freely available easy-to-use software ‘EZR’ for  
340 medical statistics. *Bone Marrow Transplant* 48:452-458, 2013.
- 341 19. Muik A, Wallisch AK, Sanger B, et al. Neutralization of SARS-CoV-2 lineage  
342 B.1.1.7 Pseudovirus by BNT162b2 vaccine-elicited human sera. *Science*  
343 371:1152-1153, 2021.
- 344 20. Krammer F. SARS-CoV-2 vaccines in development. *Nature* 586:516-527, 2020.
- 345 21. Wiedermann U, Garner-Spitzer E, Wagner A. Primary vaccine failure to routine  
346 vaccines: why and what to do? *Hum Vaccin Immunother* 12:239-243, 2016.
- 347 22. Shem-Tov N, Yerushalmi R, Danylesko I, et al. Immunogenicity and safety of the  
348 BNT162b2 mRNA COVID-19 vaccine in haematopoietic stem cell transplantation  
349 recipients. *Br J Haematol* 196:884-891, 2022.
- 350 23. Nomura Y, Sawahata M, Nakamura Y, et al. Age and smoking predict antibody  
351 titres at 3 months after the second dose of the BNT162b2 COVID-19 vaccine.  
352 *Vaccines (Basel)* 9:1042, 2021.
- 353 24. Herzog Tzarfati K, Gutwein O, Apel A, et al. BNT162b2 COVID-19 vaccine is  
354 significantly less effective in patients with hematologic malignancies. *Am J*  
355 *Hematol* 96:1195-1203, 2021.
- 356 25. Monin L, Laing AG, Munoz-Ruiz M, et al. Safety and immunogenicity of one  
357 versus two doses of the COVID-19 vaccine BNT162b2 for patients with cancer:  
358 interim analysis of a prospective observational study. *Lancet Oncol* 22:765-778,  
359 2021.
- 360 26. Shroff RT, Chalasani P, Wei R, et al. Immune responses to two and three doses of  
361 the BNT162b2 mRNA vaccine in adults with solid tumors. *Nat Med* 27:2002-  
362 2011, 2021.

- 363 27. Mascellino MT, Di Timoteo F, De Angelis M, Oliva A. Overview of the main anti-  
364 SARS-CoV-2 vaccines: mechanism of action, efficacy and safety. *Infect Drug*  
365 *Resist* 14:3459-3476, 2021.
- 366 28. Israel A, Merzon E, Schäffer AA, et al. Elapsed time since BNT162b2 vaccine and  
367 risk of SARS-CoV-2 infection: test negative design study. *BMJ* 375 :e067873,  
368 2021.
- 369 29. Levin EG, Lustig Y, Cohen C, et al. Waning immune humoral response to  
370 BNT162b2 Covid-19 vaccine over 6 months. *N Engl J Med* 385:e84-e84, 2021.
- 371

372 **Figure legends**

373 **Fig 1. SARS-CoV-2 anti-spike antibody responses in suboptimal/normal**

374 **responders before and after vaccination with the BNT162b2 vaccine**

375

376 **Fig 2. SARS-CoV-2 neutralizing antibody activity responses after the second dose**

377 **of BNT162b2 vaccine in suboptimal responders**

Fig. 1A

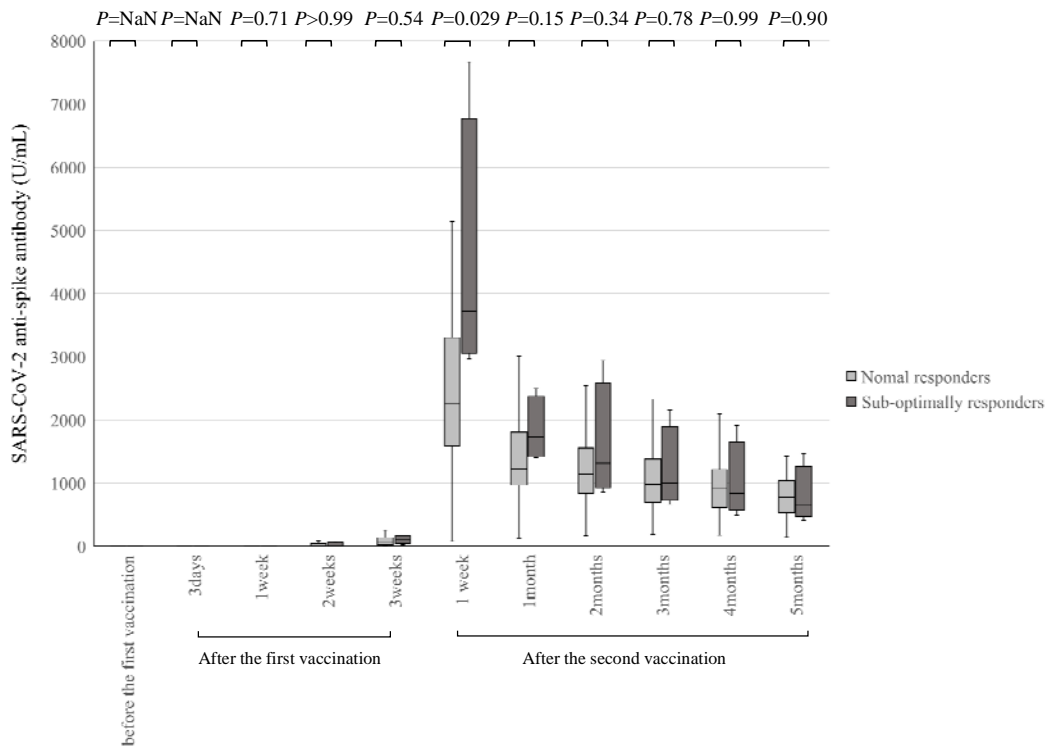

Fig. 1B

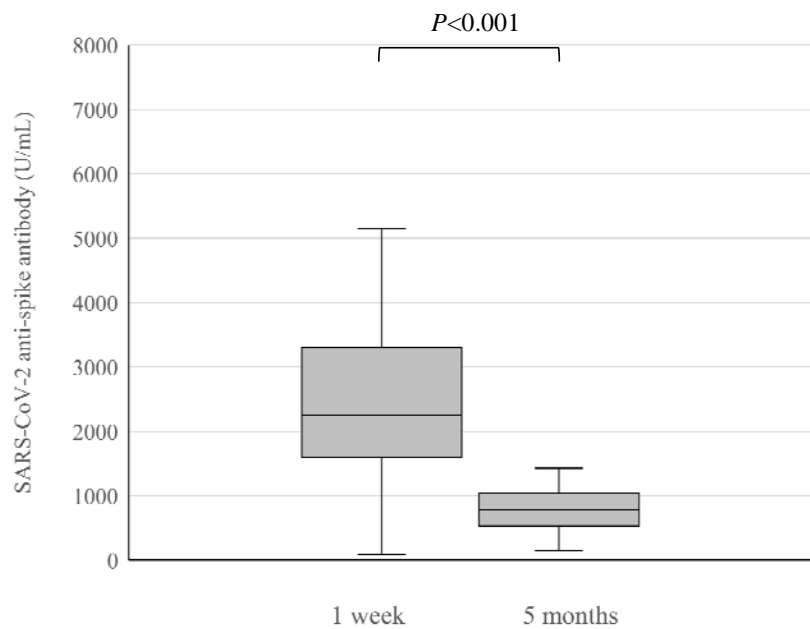

Fig. 1C

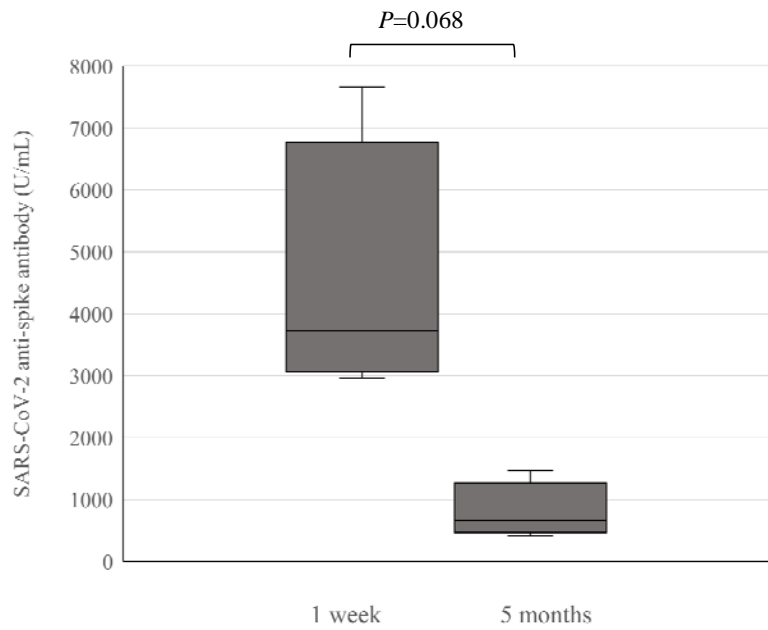

Fig. 2

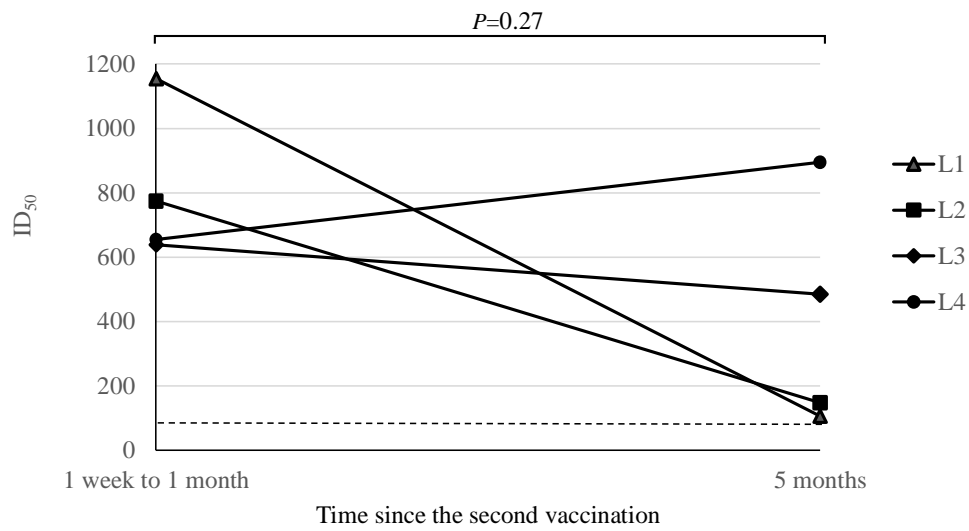

Source: https://medrxiv.org/content/10.1101/2021.12.26.21268358v4.full.pdf
